24 **ABSTRACT**

25 A large subset of patients with Angelman syndrome (AS) suffer from concurrent gastrointestinal  
26 (GI) issues, including constipation, poor feeding, and reflux. AS is caused by the loss of  
27 ubiquitin ligase E3A (*UBE3A*) gene expression in the brain. Clinical features of AS, which  
28 include developmental delays, intellectual disability, microcephaly, and seizures, are primarily  
29 due to the deficient expression or function of the maternally inherited *UBE3A allele*. The  
30 association between neurodevelopmental delay and GI disorders is part of the increasing  
31 evidence suggesting a link between the brain and the gut microbiome via the microbiota-gut-  
32 brain (MGB) axis. To investigate the associations between colonization of the gut microbiota in  
33 AS, we characterized the fecal microbiome in three animal models of AS containing maternal  
34 deletions of *Ube3A*, including mouse, rat, and pig, using 16S ribosomal RNA amplicon  
35 sequencing. Overall changes in the microbial composition of all three animal models of AS in  
36 both the phylum and genus levels of bacterial abundance were identified. Specific bacterial  
37 groups were significantly increased across all animal models, including: *Lachnospiraceae*  
38 *Incertae sedis*, *Desulfovibrios sp.*, and *Odoribacter*, which have been correlated with  
39 neuropsychiatric disorders. Taken together, these findings suggest that specific changes to the  
40 local environment in the gut are driven by a *Ube3a* maternal deletion, unaffected by varying  
41 housing conditions and are prominent and detectable across multiple small and large model  
42 species. These findings may begin to uncover the underlying mechanistic causes of GI  
43 disorders in AS patients and provide future therapeutic options for AS patients.

44 **IMPORTANCE**

45 Angelman syndrome (AS) associated gastrointestinal (GI) symptoms significantly impact quality  
46 of life in patients. Using AS models in mouse, rat, and pig, AS animals showed impaired  
47 colonization of the gut microbiota compared to wild type (healthy) control animals. Unique  
48 changes in AS microbiomes across all three animal models may be important in causing GI  
49 symptoms and may help to identify ways to treat these comorbidities in patients in the future.

## 50 INTRODUCTION

51 Angelman syndrome (AS) is a rare (1 in 15,000 births) genetic neurodevelopmental  
52 syndrome caused by the loss of maternally inherited ubiquitin ligase E3A (*UBE3A*) gene  
53 expression in mature neurons of the brain (1, 2). The paternal copy of *UBE3A* is expressed in  
54 most peripheral organs, potentially leading to haploinsufficiency in these tissues. However, due  
55 to brain-specific imprinting, paternal *UBE3A* is silenced in the central nervous system (CNS) by  
56 a long non-coding antisense transcript (*UBE3A-ATS*), resulting in a complete loss of *UBE3A*  
57 expression in the brain (3). This genetic configuration in AS leads to microcephaly, severe  
58 developmental delays, deficiencies in expressive communication, typical facial appearance,  
59 deficits in movement and coordination, hypotonia, generalized epilepsy, sleep disturbances, and  
60 other characteristic behaviors, such as frequent smiling and laughter (4). In addition to the  
61 effects on neurodevelopment, many caregivers report gastrointestinal (GI) issues in AS patients.  
62 Particularly, children with AS are often reported as poor feeders due to hypotonia of the throat  
63 (5) and have a high rate of constipation (6). Despite this strong association of GI disorders in AS  
64 patients, the mechanisms underlying this remain largely unknown.

65 The microbiota-gut-brain (MGB) axis represents the bidirectional communication  
66 pathways that connect the gut-microbiota to the brain and modulate behavior (7). Studies using  
67 germ-free (GF) mice have identified multiple behavioral impairments, including cognitive deficits  
68 (8) and anxiolytic behaviors (9), compared to colonized controls, supporting a role for gut  
69 microbes in maintaining these behaviors. Regulation of behaviors by gut bacteria might occur  
70 via a combination of multiple pathways, including endocrine signaling through hormones and  
71 neuro-active metabolites, as well as signaling via the immune system and vagus nerve.  
72 Colonization of the gut microbiome begins at birth and plays a critical role in building a healthy  
73 gut, shaping immune processes and neurodevelopment (10, 11).

74 The disruption of microbial communities in the GI tract has been implicated in a number  
75 of different neurodevelopmental and neurodegenerative disorders, such as autism spectrum

76 disorders (12, 13), Alzheimer's disease (14, 15), Parkinson's disease (16–18), depression (19),  
77 amyotrophic lateral sclerosis (20–22), schizophrenia (23, 24), and attention-deficit/hyperactivity  
78 disorder (25). Monogenetic neurodevelopmental disorders may also exhibit changes in microbial  
79 composition that may explain some of the GI symptoms seen in subsets of patients. For  
80 example, Rett Syndrome, a severe and progressive X-linked neurological disorder affecting  
81 mainly females due to mutations in the *MECP2* gene, has a strong association with GI  
82 dysfunction, including intestinal dysbiosis which is characterized as a disruption to the bacterial  
83 homeostasis (26–28). Relevant to the work herein, the same region on chromosome 15 that is  
84 affected in AS, causes Prader-Willi syndrome (PWS) when the paternal contribution of genes on  
85 chromosome 15 is lost. Although clinically distinct from AS, individuals with PWS exhibit obesity,  
86 hyperphagia, and reduced metabolic rate, in the context of an altered microbiome (29–31). The  
87 frequency and scope of GI illnesses in AS, however, have never been studied and the  
88 diagnostic consensus estimates that the prevalence may affect between 70% of individuals with  
89 AS (6). GI problems in AS were reviewed using medical records of 163 individuals with AS with  
90 different genetic subtypes and characterized, identifying at least one GI dysfunction in most  
91 patients (6). The two most common dysfunctions were constipation and gastroesophageal reflux  
92 disease (GERD). Other GI problems reported included cyclic vomiting episodes, difficulty  
93 swallowing, excessive swallowing, and eosinophilic esophagitis (6). Despite this prevalence of  
94 GI symptoms in AS patients, a 16S ribosomal RNA sequencing study in AS patients has not  
95 been performed yet.

96 To study the potential impacts of AS on the brain on the gut microbiota, three AS animal  
97 models that lack maternal UBE3A expression, similar to humans, were compared. The mouse  
98 model contains an inserted nonsense mutation in exon 2 of the mouse *Ube3a* gene (32),  
99 whereas the rat (33–35) and pig models have a full gene deletion from the use of CRISPR/Cas9  
100 nucleases flanking the *Ube3a* gene. We compared the global gut microbial community (alpha  
101 and beta diversity), as well as the microbial composition at the taxonomic phylum and genus

102 level in all three animal models. In addition, to better understand the underlying metabolic  
103 processes affected by changes in the microenvironment of the gut microbiota in genetic animal  
104 models of AS, an inference of metabolic pathways based on the bacterial microbiome was  
105 performed. While similar changes were seen at the phylum level in AS animals compared to  
106 controls, distinct patterns were observed in each species.

107  
108  
109

## 110 **METHODS**

### 111 **Animals**

112 Mice used in the study were B6.129S7-*Ube3a*<sup>tm1Alb</sup>/J (Jackson Laboratory strain #:016590) (32).  
113 Wild type (WT) C57B6/J littermates served as controls. The recently characterized  
114 *Ube3a*<sup>m\*/p+</sup> AS rat model contained a full 90-kb deletion of the maternal *Ube3a* gene on Sprague-  
115 Dawley background (33, 34), with WT littermates serving as controls. The AS pig model (*Sus*  
116 *scrofa*) contained a full 97-kb deletion of the maternal *UBE3A* gene on a mixed  
117 Yorkshire/Landrace background (S.V.D., personal communication). Littermates of both  
118 genotypes were housed together for all species.

### 119 **Fecal sample collection**

120 In total, 41 mice, 26 rats, and 8 pig fecal samples from both sexes were collected for this study  
121 (**Table 1**). Mice were 13-25 weeks of age, rats were 8 weeks of age, and the pigs were 17  
122 weeks old, at the time of the fecal sample collection. All animals were housed in appropriate  
123 light/dark conditions and fed standard food/water according to the model's dietary needs. Mice  
124 and rats received Teklad global 18% protein rodent diets 2918 (Envigo, Hayward, CA, USA).  
125 Pigs received MG Pig Starter 20% - Gen 2.0 for pigs weighing up to 44 pounds and for adults:  
126 MG Hog Pellets (M-G, INC. Feed Division, TX, USA).

127 Fecal samples from mice and rats were collected at the University of California, Davis. To  
128 collect the fecal samples, animals were placed individually in an empty sterile cage for 5 min  
129 and freshly dropped fecal pellets were collected aseptically into sterile tubes using sterile pipette  
130 tips or sterile tweezers. Samples from pigs were collected at Texas A&M University. The  
131 samples were collected after euthanasia using a sterile fecal loop into sterile tubes and stored at  
132 -80 C until further processing.

### 133 **16S Illumina sequencing**

134 DNA was extracted from 20 - 40 mg fecal matter using the QIAamp Powerfecal Kit (Qiagen).  
135 The library preparation and sequencing was performed by the Host Microbe Systems Biology  
136 Core at UC Davis using primer pair 341F and 806R in 300 bp paired-end run for the V3-V4  
137 hypervariable regions of the 16S rRNA on an Illumina MiSeq (Illumina, San Diego). The 16S  
138 rRNA Raw FASTQ sequence files were deposited and processed in QIITA (36) using per-  
139 sample FASTQs with a Phred offset of 33, min\_per\_read\_length\_fraction of 0.75 and default  
140 parameters for error detection using Split libraries FASTQ. Sequences were trimmed to 250 bp  
141 and possible errors of sequencing were filtered using DEBLUR with default parameters.  
142 Reference operational taxonomic units (OTUs) were defined using the SILVA reference  
143 database with a minimum similarity threshold of 97% and corresponding taxonomy assignment  
144 using the default parameters in QIITA. Singletons (OTUs with less than three reads), sequences  
145 matching chloroplasts, mitochondria, and unassigned sequences were removed from  
146 downstream analyses followed by a rarefaction to the minimum library size, which was 21907.  
147 The main variable utilized for analysis was genotype, WT control or AS, with each species  
148 assessed individually or compared to each other in a single group analysis.

149         Alpha diversity, beta diversity, and taxonomic composition plots were built using R's  
150 ggplot2 package (37, 38). Beta diversity analyses of microbial communities were performed by  
151 computing the pairwise Bray–Curtis distances (39) between samples and plotted using non-

152 metric multidimensional scaling (NMDS). To determine the significance of the dispersion  
153 between the samples, the results of analysis dissimilarities were calculated directly from the  
154 distance matrix with an ADONIS. Alpha richness (Chao1: estimated number of OTUs), and  
155 diversity (Shannon: index of equitability) (40) indexes were used to establish significant  
156 differences between the genotypes and animal models, which were assessed with the non-  
157 parametric Wilcoxon test. Significance was defined as  $p < 0.05$ . To establish significant differences  
158 between specific OTUs, we applied a fold change analysis using the Deseq2 pipeline (41) to  
159 visualize possible bacterial biomarkers related to the genotype in all the samples, in the  
160 separate models.

161

#### 162 **PICRUSt metabolic analysis**

163 Metabolic pathway inference analyses were performed using PICRUSt2 software (42). A  
164 pathway level-inference analysis was performed, where MetaCY pathways are inferred using  
165 enzyme classification number of abundances. Output used for analysis is composed of an  
166 unstratified (sum of all sequences contributing by OTUs) pathway abundance table. Analysis  
167 was performed using Metaboanalyst software (43) where pathways were filtered by the mean  
168 intensity and log transformation of the abundance counts. Subsequently, the ward clustering  
169 method was used and Euclidean distances to group heatmaps presented only significantly  
170 different pathways identified. Significance was calculated using a t-test or ANOVA as  
171 appropriate.

172

173



174 **RESULTS**

175 **The global microbial community structure in AS animal models is specific to each**  
176 **species**

177 Richness and diversity measures across all species were performed. These findings indicate  
178 that the mouse model is much less rich in total bacterial numbers in comparison to both pig and  
179 rat models (**Fig 1A**). In contrast, the diversity index shows that both mouse and pig models are  
180 similar in diversity, whereas the rat model is significantly higher in diversity (**Fig 1A**). Significant  
181 dispersion based on animal model ( $***p < 0.001$ ) was observed, however there is no significant  
182 separation based on genotype ( $p = 0.7$ ; **Fig 1B**).

183 Individual animal model analysis was performed to assess specific differences in the microbial  
184 community structure between WT vs. AS for each animal species. The microbial community  
185 structure of individual animals relative to the genotype identified no significant differences  
186 between genotypes across all three species (**Fig 2A, C, E**). Alpha diversity analysis exploring  
187 the richness and diversity index of the individual species identified significant differences in  
188 mice, with both Chao1 and Shannon indexes supporting a richer ( $p < 0.01$ ) and more diverse ( $p$   
189  $< 0.05$ ) microbiome in AS mice compared to WT controls (**Fig 2B**). In contrast, no significant  
190 differences were identified in either pig or rat between AS and WT animals (**Fig 2D, F**).

191

192 **Overall microbial composition differences in multiple AS animal models**

193 To characterize the differences between the most abundant operational taxonomic units (OTUs)  
194 in each genotype, the relative abundance of all OTUs was calculated and only phyla and genera  
195 with a minimum of 1% relative abundance were included in the analysis. Phylum level  
196 differences in relative abundance are consistent between the AS and WT in all animal models  
197 (**Fig 3**). Across the three AS animals, a reduction of *Firmicutes* (green) and an increase of  
198 *Bacteroidota* (red) were observed compared to WT controls, representing the major phyla for all  
199 three animal models (**Fig 3A-C**). In contrast, an increase of *Actinobacteriota* was identified in

200 both AS mice and pigs, which was reduced in the AS rats in comparison to WT (**Fig 3B**). These  
201 differences at the phylum level suggest that the AS genotype disrupts the abundance of the  
202 most highly abundant phyla in the gut, with similar changes observed across multiple species.

203 At the genus level, all AS animals demonstrated differences in abundance when  
204 compared to their respective WT control. For example, in AS mice, an increase of *Bacteroides*,  
205 *Coriobacteriaceae UCG-002*, *Faecalibaculum*, *Helicobacter*, *Incertae Sedis*, *Lachnospiraceae*  
206 *NK4A136 group and UCG-006*, *Marvinbryantia*, and *Turicibacter* was observed in comparison to  
207 WT control mice (**Fig 4A**). This was accompanied by a reduction of *Lactobacillus*, and  
208 *Dubosiella* (**Fig 4A**). In AS rats, an increase in *Bacteroides*, *Blautia*, *Gastranaerophilales*,  
209 *Monoglobus*, *Nocardia*, *Roseburia*, and *Ruminococcus* was seen (**Fig 4B**). This was coupled  
210 with a decrease in *Akkermansia*, *Eubacterium ventriosum group*, *Tepidibacter*, and  
211 *Lachnospiraceae UCG 001* compared to WT controls (**Fig 4B**). Lastly, AS pigs had increased  
212 *Subdoligranulum*, *Tepidibacter*, *Treponema*, *Faecalibacterium*, *Blautia*, and *Butyricoccus*,  
213 whereas there was a decrease in *UCG-005*, *Costridium sensu stricto1*, *Fibrobacter*,  
214 *Monoglobus*, and *Streptococcus* compared to WT control pigs. While species-level  
215 characterization is preferable to establish the specific role of each organism in the gut, the  
216 genus characterizations can provide an important picture of how the genetic impairment affects  
217 the microbial composition (44). Taken together, the analysis of all the animal models shows  
218 differences between the AS and WT animals at the genus level, but these differences do not  
219 overlap across models, in contrast to the findings at the phylum level, highlighting the difference  
220 in composition across each species.

221

## 222 **Bacterial biomarkers identified across and within AS models**

223 Due to the wide differences in genus-level taxonomic composition found between the  
224 different animal models, a fold change (Deseq2) analysis was performed by genotype and  
225 separated by animal model. This analysis helps establish specific high and low abundant taxon

226 that are differentially abundant within the microbial ecosystem according to genotype. Analysis  
227 of AS vs WT across all three animal models identified a differential abundance of  
228 *Desulfobacterota*, *Bacteroidota* and *Firmicutes* genera based on genotype. Genus level  
229 differences showed a higher prevalence of *UCG-010*, *Incertae Sedis*, *Desulfovibrio*,  
230 *Odoribacter*, and *Butyrivicocaceae* family members in AS animals (**Fig 5A**). In contrast, WT  
231 animals had a differential abundance of *Clostridium sensu stricto*, *NK4214 group*, and  
232 *Lachnospiraceae UCG 001* (**Fig 5A**).

233 While these differences account for the genotype in all the animal models, there are also  
234 innate differences between the gut microbiome of all three species. Therefore, fold change  
235 analysis was performed in all the models individually by genotype. In mice, a differential  
236 abundance of *Incertae Sedis*, *Oscillibacter*, *UCG 010*, *Marvinbryantia*, *Lachnospiraceae*  
237 *NK4A136 group*, and other unclassified genera pertaining to *Oscillospiraceae*,  
238 *Laachnospiraceae*, and *Ruminococaceae* families were identified in the AS model compared to  
239 WT controls (**Fig 5B**). In the rat and pig models, fewer bacterial genera were differentially  
240 abundant in AS animals, these being *Gastranaerophilales*, *Streptococcus*, and *Rhizobiaceae*  
241 family (only in pig), and some unclassified *Bacteroidota* and *Proteobacteria* (only in rat) phylum-  
242 level bacterium compared to WT controls (**Fig 5C, D**). WT rats and pigs presented with  
243 *NK4A214 group* and unclassified *Actinobacteria* as being highly prevalent in compared to AS  
244 animals (**Fig 5C, D**). These findings suggest similarities between pig and rat microbial  
245 ecosystems and illustrate how the AS genotype affects the intestinal bacterial community.

246

#### 247 **Differential bacterial metabolic pathways identified in each animal model of AS**

248 To better understand the underlying metabolic processes affected by changes in the  
249 microenvironment of the gut microbiota in genetic animal models of AS, an inference of  
250 metabolic pathways based on the bacterial microbiome was performed using PICRUST. The  
251 metabolic pathway analysis was performed for both individual species and the animal models

252 combined, which allowed visualization of important pathways that play a role in each animal  
253 model and pathways that are impacted specifically due to genotype. The combined model  
254 analysis shows that the microbiota in AS animals have higher activity in processes such as  
255 glycolysis, lactic fermentation, glycan building blocks, nucleoside biosynthesis, vitamin B1  
256 synthesis, vitamin B5, and CoA biosynthesis, and urate production and accumulation (**Fig 6A**)  
257 compared to WT controls. These results suggest changes in the metabolic pathway activity  
258 based on genotype, yet preexisting differences based on each animal model can introduce  
259 variability.

260 In the mouse, metabolic pathways reflect changes based on genotype. Increased activity of  
261 amino acid biosynthesis, isopentenyl diphosphate synthesis, adenosylcobalamin salvage, and  
262 biosynthesis from vitamin B12 analogs (cobinamides) were found in AS mice compared to WT  
263 controls (**Fig 6B**). In the rat, similar increases in the biosynthesis of amino acids, lipokine  
264 biosynthesis (palmitoleate), fatty acid synthesis, and biotin biosynthesis were observed (**Fig**  
265 **6C**). Finally, in the pig model, increase biosynthesis of thiazole (vitamin B1), production of  
266 polyamines, and changes in the reductive TCA cycle (responsible for making organic molecules  
267 to produce sugars, lipids, amino acids, etc.) were observed in AS compared to WT animals (**Fig**  
268 **6D**).

269 Overall, when we compare the individual metabolic differences within the animal models'  
270 similarities among biosynthesis of amino acids pathways are observed. Additionally, they all  
271 present different pathways related to the vitamin B complex and its involvement in biological  
272 processes, suggesting a common feature of AS across animal models.

273

## 274 **DISCUSSION**

275 In the past decade, there has been a significant increase in research on AS, from basic to  
276 applied research, due in part to a large effort to create preclinical animal models for the purpose  
277 of identifying targeted treatments and outcome measures for future clinical trials (45). Given that

278 GI symptoms are commonly seen in patients and can significantly impair their quality of life, the  
279 identification of factors that can regulate GI physiology is critical in advancing these goals. The  
280 gut microbiome is crucial for the establishment of GI physiology and function, and alterations in  
281 the colonization of the gut microbiome are prevalent in neurodevelopmental disorders.  
282 Characterizing the impacts of *Ube3a* deletion on the gut microbiome using animal models has  
283 the powerful advantage to control for variables that are challenging in humans, including  
284 environment and diet. As there are currently no gut microbiome studies reported in AS patients,  
285 this study represents the first attempt to characterize the microbiome in AS, using animal  
286 models, and to identify pathways that could be targeted to improve GI pathophysiology in  
287 patients. Here we use 16S ribosomal DNA amplicon sequencing in AS animal models in three  
288 species to uncover common colonization features associated with maternal *Ube3a* deletion.

289         In the current study, we first looked at the biodiversity at different scales, both within  
290 each model and common across all three models. The mouse model was found to be much less  
291 rich and diverse in comparison to the other two AS models. The lack of diversity and richness,  
292 as measured by alpha diversity, has been reported before in laboratory mice compared to wild  
293 *M. domesticus*, and is likely in part due to the standard diet to which they are provided (46).  
294 However, based on beta diversity, the mouse microbiota seems to be closer to humans than  
295 that of rats (47). No major differences in the microbial structure were observed in AS animal  
296 models compared to WT controls, which suggests that the overall primary microbial community  
297 remained conserved. Given that only bacteria with a greater than 1% overall abundance were  
298 assessed, it is possible that the changes could be occurring in low abundance bacterial groups  
299 that were not captured in this analysis. Alterations in less abundant bacteria can potentially  
300 change interactions within the gut without affecting the overall microbial community.

301         Findings from the highly abundant taxonomic groups suggest that the main differences  
302 between the AS animals and WT controls reside in a reduction of lactic acid bacteria that are  
303 essential in the gut for maintaining health (48–51). The decrease of *Bifidobacterium* coupled

304 with an increase in the abundance of *Bacteroides* was seen in AS animals, which has been  
305 previously observed in patients with chronic constipation (52, 53). As typically seen in  
306 constipation studies, there is no direct consensus whether these changes in the gut microbiome  
307 are causal or the result of a side effect of the condition. However, constipation is the most  
308 common symptom seen in AS patients, and these findings support a change in the microbial  
309 composition associated with the AS genotype. Observing these trends in taxonomic groups  
310 within three different animal models of AS further supports that these differences arise due to  
311 genetic deletions resulting in AS.

312 The GI tract communicates bidirectionally with the brain and is closely associated with  
313 neurodevelopment, as both develop during early neonatal life in multiple animals. Altered  
314 colonization of the gut microbiota, termed “dysbiosis”, has been observed to correlate with  
315 disease in patients with neurodevelopmental delays such as autism spectrum disorder (ASD)  
316 (13). In ASD, behavioral and neurodevelopmental changes have been correlated with a  
317 reduction of *bifidobacterium* and *blautia* species (54), similar to AS animal models seen here,  
318 when compared to WT controls. These findings suggest that these microbial community  
319 impairments may serve as the main contributor to neurodevelopmental delays. The abundance  
320 of other bacterial species, including *desulfovibrio*, *lactobacillus*, and *bacteroides* are also  
321 increased in ASD (54, 55). Our fold change analysis presented an overall increased prevalence  
322 of *Lachnospiraceae insertae sedis*, *Desulfovibrio* and *Odoribacter* in AS in comparison to WT  
323 controls. Increased *Lachnospiraceae insertae sedis* has been associated with multiple diseases,  
324 including major depressive disorder, and non-alcoholic fatty liver disease (56). Moreover,  
325 *Desulfovibrio* has been correlated with Parkinson’s disease and its abundance in the gut is  
326 directly correlated with disease severity (57). Furthermore, *Odoribacter* has been correlated with  
327 attention-deficit/hyperactivity disorder and destabilizes the levels of dopamine and serotonin in  
328 the gut (58). This suggests the observed bacterial groups increased in AS align with current  
329 studies of other neurodevelopmental diseases (59).

330 Prediction of the metabolic function changes resulting from the altered gut microbiota in  
331 AS animals allow us to understand the metabolic implication of dysbiosis in AS. As explored in  
332 the inferred metabolic pathways analysis using PICRUST2, changes in vitamin B12 synthesis  
333 and utilization are impacted due to microbial dysbiosis. Since vitamin B12 has the potential to  
334 break down homocysteine, increased B12 will increase homocysteine which is directly  
335 correlated with dementia, heart disease, and stroke (60). In mice, deficiency of B12 is  
336 associated with protection against colitis (61), while in rats, B12 deficiency causes intestinal  
337 barrier defects (62). Cobalamin or B12 deficiency can cause increased homocysteine, or  
338 hyperhomocysteinemia, which occurs commonly in patients with inflammatory bowel disease  
339 (63). Similar changes in the gut microbial ecosystem in ASD studies showed the implications of  
340 gut dysbiosis in the production and utilization of vitamins such as B12 (64). The use of  
341 comparisons between AS and ASD that lead to microbial dysbiosis and metabolic disparities  
342 has the potential to identify what changes in the metabolome and microbiome contribute to  
343 disease severity.

344 In conclusion, the microbial composition analysis of AS within three separate animal  
345 models shows a prominent change in the composition and metabolic capacity of the gut  
346 microbiome compared to WT control animals. Bacterial groups that are significantly altered  
347 within the AS models have also been correlated with other neurodegenerative and GI diseases,  
348 highlighting their important role in gut-brain communication. It remains to be determined whether  
349 the gut microbiome is a cause or effect of the GI AS symptoms, but the current analysis  
350 suggests that the microbial ecosystem may promote adverse gut-brain pathways. Beneficially  
351 modulating the gut microbiome may serve to improve both neural and gastric symptomatology  
352 in patients with AS, possibly improving overall quality of life.

353

354

355 **ACKNOWLEDGEMENTS**

356 16S rRNA sequencing was carried out by the Host Microbe Systems Biology Core at UC Davis  
357 Genome Center.

358

359 **FUNDING**

360

361 • P50HD103526/Eunice Kennedy Shriver National Institute of Child Health and Human  
362 Development (PI Abbedutto)

363 • R01NS097808/NS/NINDS NIH HHS/United States

364 • Foundation for Angelman Syndrome for Therapeutics (FAST; UB; DJS and JLS)

365 • UC Davis PREP postbac award (NIHR25GM116690) (BVC)

366

367



368

## 369 **References**

- 370 1. Magenis RE, Brown MG, Lacy DA, Budden S, LaFranchi S. 1987. Is Angelman syndrome an  
371 alternate result of del(15)(q11q13)? *Am J Med Genet* 28:829–838.
- 372 2. Buckley RH, Dinno N, Weber P. 1998. Angelman syndrome: Are the estimates too low?  
373 *American Journal of Medical Genetics* [https://doi.org/10.1002/\(sici\)1096-](https://doi.org/10.1002/(sici)1096-8628(19981204)80:4<385::aid-ajmg15>3.0.co;2-9)  
374 [8628\(19981204\)80:4<385::aid-ajmg15>3.0.co;2-9](https://doi.org/10.1002/(sici)1096-8628(19981204)80:4<385::aid-ajmg15>3.0.co;2-9).
- 375 3. Hsiao JS, Germain ND, Wilderman A, Stoddard C, Wojenski LA, Villafano GJ, Core L, Cotney  
376 J, Chamberlain SJ. 2019. A bipartite boundary element restricts imprinting to mature  
377 neurons. *Proc Natl Acad Sci U S A* 116:2181–2186.
- 378 4. Buiting K, Williams C, Horsthemke B. 2016. Angelman syndrome - insights into a rare  
379 neurogenetic disorder. *Nat Rev Neurol* 12:584–593.
- 380 5. Thibert RL, Larson AM, Hsieh DT, Raby AR, Thiele EA. 2013. Neurologic manifestations of  
381 Angelman syndrome. *Pediatr Neurol* 48:271–279.
- 382 6. Glassman LW, Grocott OR, Kunz PA, Larson AM, Zella G, Ganguli K, Thibert RL. 2017.  
383 Prevalence of gastrointestinal symptoms in Angelman syndrome. *American Journal of*  
384 *Medical Genetics Part A* <https://doi.org/10.1002/ajmg.a.38401>.
- 385 7. Cryan JF, O’Riordan KJ, Cowan CSM, Sandhu KV, Bastiaanssen TFS, Boehme M, Codagnone  
386 MG, Cusotto S, Fulling C, Golubeva AV, Guzzetta KE, Jaggar M, Long-Smith CM, Lyte JM,  
387 Martin JA, Molinero-Perez A, Moloney G, Morelli E, Morillas E, O’Connor R, Cruz-Pereira JS,

- 388 Peterson VL, Rea K, Ritz NL, Sherwin E, Spichak S, Teichman EM, van de Wouw M, Ventura-  
389 Silva AP, Wallace-Fitzsimons SE, Hyland N, Clarke G, Dinan TG. 2019. The Microbiota-Gut-  
390 Brain Axis. *Physiol Rev* 99:1877–2013.
- 391 8. Gareau MG, Wine E, Rodrigues DM, Cho JH, Whary MT, Philpott DJ, Macqueen G, Sherman  
392 PM. 2011. Bacterial infection causes stress-induced memory dysfunction in mice. *Gut*  
393 60:307–317.
- 394 9. Diaz Heijtz R, Wang S, Anuar F, Qian Y, Björkholm B, Samuelsson A, Hibberd ML, Forsberg  
395 H, Pettersson S. 2011. Normal gut microbiota modulates brain development and behavior.  
396 *Proc Natl Acad Sci U S A* 108:3047–3052.
- 397 10. Borre YE, O’Keeffe GW, Clarke G, Stanton C, Dinan TG, Cryan JF. 2014. Microbiota and  
398 neurodevelopmental windows: implications for brain disorders. *Trends Mol Med* 20:509–  
399 518.
- 400 11. Sordillo JE, Korrick S, Laranjo N, Carey V, Weinstock GM, Gold DR, O’Connor G, Sandel M,  
401 Bacharier LB, Beigelman A, Zeiger R, Litonjua AA, Weiss ST. 2019. Association of the Infant  
402 Gut Microbiome With Early Childhood Neurodevelopmental Outcomes: An Ancillary Study  
403 to the VDAART Randomized Clinical Trial. *JAMA Netw Open* 2:e190905.
- 404 12. Sharon G, Cruz NJ, Kang D-W, Gandal MJ, Wang B, Kim Y-M, Zink EM, Casey CP, Taylor BC,  
405 Lane CJ, Bramer LM, Isern NG, Hoyt DW, Noecker C, Sweredoski MJ, Moradian A,  
406 Borenstein E, Jansson JK, Knight R, Metz TO, Lois C, Geschwind DH, Krajmalnik-Brown R,  
407 Mazmanian SK. 2019. Human Gut Microbiota from Autism Spectrum Disorder Promote

- 408 Behavioral Symptoms in Mice. *Cell* 177:1600–1618.e17.
- 409 13. Strati F, Cavalieri D, Albanese D, De Felice C, Donati C, Hayek J, Jousson O, Leoncini S, Renzi  
410 D, Calabrò A, De Filippo C. 2017. New evidences on the altered gut microbiota in autism  
411 spectrum disorders. *Microbiome* 5:24.
- 412 14. Wang X, Sun G, Feng T, Zhang J, Huang X, Wang T, Xie Z, Chu X, Yang J, Wang H, Chang S,  
413 Gong Y, Ruan L, Zhang G, Yan S, Lian W, Du C, Yang D, Zhang Q, Lin F, Liu J, Zhang H, Ge C,  
414 Xiao S, Ding J, Geng M. 2019. Sodium oligomannate therapeutically remodels gut  
415 microbiota and suppresses gut bacterial amino acids-shaped neuroinflammation to inhibit  
416 Alzheimer’s disease progression. *Cell Res* 29:787–803.
- 417 15. Zhuang Z-Q, Shen L-L, Li W-W, Fu X, Zeng F, Gui L, Lü Y, Cai M, Zhu C, Tan Y-L, Zheng P, Li H-  
418 Y, Zhu J, Zhou H-D, Bu X-L, Wang Y-J. 2018. Gut Microbiota is Altered in Patients with  
419 Alzheimer’s Disease. *J Alzheimers Dis* 63:1337–1346.
- 420 16. Sampson TR, Debelius JW, Thron T, Janssen S, Shastri GG, Ilhan ZE, Challis C, Schretter CE,  
421 Rocha S, Gradinaru V, Chesselet M-F, Keshavarzian A, Shannon KM, Krajmalnik-Brown R,  
422 Wittung-Stafshede P, Knight R, Mazmanian SK. 2016. Gut Microbiota Regulate Motor  
423 Deficits and Neuroinflammation in a Model of Parkinson’s Disease. *Cell* 167:1469–  
424 1480.e12.
- 425 17. Vascellari S, Palmas V, Melis M, Pisanu S, Cusano R, Uva P, Perra D, Madau V, Sarchioto M,  
426 Oppo V, Simola N, Morelli M, Santoru ML, Atzori L, Melis M, Cossu G, Manzin A. 2020. Gut  
427 Microbiota and Metabolome Alterations Associated with Parkinson’s Disease. *mSystems* 5.

- 428 18. Scheperjans F, Aho V, Pereira PAB, Koskinen K, Paulin L, Pekkonen E, Haapaniemi E,  
429 Kaakkola S, Eerola-Rautio J, Pohja M, Kinnunen E, Murros K, Auvinen P. 2015. Gut  
430 microbiota are related to Parkinson's disease and clinical phenotype. *Mov Disord* 30:350–  
431 358.
- 432 19. Valles-Colomer M, Falony G, Darzi Y, Tigchelaar EF, Wang J, Tito RY, Schiweck C, Kurilshikov  
433 A, Joossens M, Wijmenga C, Claes S, Van Oudenhove L, Zhernakova A, Vieira-Silva S, Raes J.  
434 2019. The neuroactive potential of the human gut microbiota in quality of life and  
435 depression. *Nat Microbiol* 4:623–632.
- 436 20. Blacher E, Bashiardes S, Shapiro H, Rothschild D, Mor U, Dori-Bachash M, Kleimeyer C,  
437 Moresi C, Harnik Y, Zur M, Zabari M, Brik RB-Z, Kviatcovsky D, Zmora N, Cohen Y, Bar N,  
438 Levi I, Amar N, Mehlman T, Brandis A, Biton I, Kuperman Y, Tsoory M, Alfahel L, Harmelin  
439 A, Schwartz M, Israelson A, Arike L, Johansson MEV, Hansson GC, Gotkine M, Segal E,  
440 Elinav E. 2019. Potential roles of gut microbiome and metabolites in modulating ALS in  
441 mice. *Nature* <https://doi.org/10.1038/s41586-019-1443-5>.
- 442 21. Burberry A, Wells MF, Limone F, Couto A, Smith KS, Keaney J, Gillet G, van Gastel N, Wang  
443 J-Y, Pietilainen O, Qian M, Eggan P, Cantrell C, Mok J, Kadiu I, Scadden DT, Eggan K. 2020.  
444 C9orf72 suppresses systemic and neural inflammation induced by gut bacteria. *Nature*  
445 <https://doi.org/10.1038/s41586-020-2288-7>.
- 446 22. Wu S, Yi J, Zhang Y-G, Zhou J, Sun J. 2015. Leaky intestine and impaired microbiome in an  
447 amyotrophic lateral sclerosis mouse model. *Physiological Reports*

448 <https://doi.org/10.14814/phy2.12356>.

449 23. Zhu F, Ju Y, Wang W, Wang Q, Guo R, Ma Q, Sun Q, Fan Y, Xie Y, Yang Z, Jie Z, Zhao B, Xiao  
450 L, Yang L, Zhang T, Feng J, Guo L, He X, Chen Y, Chen C, Gao C, Xu X, Yang H, Wang J, Dang  
451 Y, Madsen L, Brix S, Kristiansen K, Jia H, Ma X. 2020. Metagenome-wide association of gut  
452 microbiome features for schizophrenia. *Nat Commun* 11:1612.

453 24. Zheng P, Zeng B, Liu M, Chen J, Pan J, Han Y, Liu Y, Cheng K, Zhou C, Wang H, Zhou X, Gui S,  
454 Perry SW, Wong M-L, Licinio J, Wei H, Xie P. 2019. The gut microbiome from patients with  
455 schizophrenia modulates the glutamate-glutamine-GABA cycle and schizophrenia-relevant  
456 behaviors in mice. *Sci Adv* 5:eaau8317.

457 25. Dam SA, Mostert JC, Szopinska-Tokov JW, Bloemendaal M, Amato M, Arias-Vasquez A.  
458 2019. The Role of the Gut-Brain Axis in Attention-Deficit/Hyperactivity Disorder.  
459 *Gastroenterol Clin North Am* 48:407–431.

460 26. Scarpato E, Bernardo P, Bravaccio C, Staiano A. 2018. P160 Nutritional status and  
461 gastrointestinal disorders in pediatric patients with Rett syndrome. *Digestive and Liver*  
462 *Disease* [https://doi.org/10.1016/s1590-8658\(18\)31158-7](https://doi.org/10.1016/s1590-8658(18)31158-7).

463 27. Borghi E, Vignoli A. 2019. Rett Syndrome and Other Neurodevelopmental Disorders Share  
464 Common Changes in Gut Microbial Community: A Descriptive Review. *Int J Mol Sci* 20.

465 28. Strati F, Cavalieri D, Albanese D, De Felice C, Donati C, Hayek J, Jousson O, Leoncini S,  
466 Pindo M, Renzi D, Rizzetto L, Stefanini I, Calabrò A, De Filippo C. 2016. Altered gut  
467 microbiota in Rett syndrome. *Microbiome* 4:41.

- 468 29. Dahl WJ, Auger J, Alyousif Z, Miller JL, Tompkins TA. 2021. Adults with Prader-Willi  
469 syndrome exhibit a unique microbiota profile. *BMC Res Notes* 14:51.
- 470 30. Alyousif Z, Miller JL, Auger J, Sandoval M, Piano A, Tompkins TA, Dahl WJ. 2020. Microbiota  
471 profile and efficacy of probiotic supplementation on laxation in adults affected by Prader-  
472 Willi Syndrome: A randomized, double-blind, crossover trial. *Mol Genet Genomic Med*  
473 8:e1535.
- 474 31. Peng Y, Tan Q, Afhami S, Deehan EC, Liang S, Gantz M, Triador L, Madsen KL, Walter J, Tun  
475 HM, Haqq AM. 2020. The Gut Microbiota Profile in Children with Prader-Willi Syndrome.  
476 *Genes* 11.
- 477 32. Jiang YH, Armstrong D, Albrecht U, Atkins CM, Noebels JL, Eichele G, Sweatt JD, Beaudet  
478 AL. 1998. Mutation of the Angelman ubiquitin ligase in mice causes increased cytoplasmic  
479 p53 and deficits of contextual learning and long-term potentiation. *Neuron* 21:799–811.
- 480 33. Dodge A, Peters MM, Greene HE, Dietrick C, Botelho R, Chung D, Willman J, Nenner  
481 AW, Ciarlone S, Kamath SG, Houdek P, Sumová A, Anderson AE, Dindot SV, Berg EL,  
482 O’Geen H, Segal DJ, Silverman JL, Weeber EJ, Nash KR. 2020. Generation of a Novel Rat  
483 Model of Angelman Syndrome with a Complete Ube3a Gene Deletion. *Autism Res* 13:397–  
484 409.
- 485 34. Berg EL, Pride MC, Petkova SP, Lee RD, Copping NA, Shen Y, Adhikari A, Fenton TA,  
486 Pedersen LR, Noakes LS, Nieman BJ, Lerch JP, Harris S, Born HA, Peters MM, Deng P,  
487 Cameron DL, Fink KD, Beitnere U, O’Geen H, Anderson AE, Dindot SV, Nash KR, Weeber EJ,

- 488 Wöhr M, Ellegood J, Segal DJ, Silverman JL. 2020. Translational outcomes in a full gene  
489 deletion of ubiquitin protein ligase E3A rat model of Angelman syndrome. *Translational*  
490 *Psychiatry* <https://doi.org/10.1038/s41398-020-0720-2>.
- 491 35. Born HA, Martinez LA, Levine AT, Harris SE, Mehra S, Lee WL, Dindot SV, Nash KR,  
492 Silverman JL, Segal DJ, Weeber EJ, Anderson AE. 2021. Early Developmental EEG and  
493 Seizure Phenotypes in a Full Gene Deletion of Ubiquitin Protein Ligase E3A Rat Model of  
494 Angelman Syndrome. *eneuro* <https://doi.org/10.1523/eneuro.0345-20.2020>.
- 495 36. Gonzalez A, Navas-Molina JA, Kosciolk T, McDonald D, Vázquez-Baeza Y, Ackermann G,  
496 DeReus J, Janssen S, Swafford AD, Orchanian SB, Sanders JG, Shorenstein J, Holste H,  
497 Petrus S, Robbins-Pianka A, Brislawn CJ, Wang M, Rideout JR, Bolyen E, Dillon M, Caporaso  
498 JG, Dorrestein PC, Knight R. 2018. Qiita: rapid, web-enabled microbiome meta-analysis.  
499 *Nat Methods* 15:796–798.
- 500 37. McMurdie PJ, Holmes S. 2013. phyloseq: An R Package for Reproducible Interactive  
501 Analysis and Graphics of Microbiome Census Data. *PLoS ONE*  
502 <https://doi.org/10.1371/journal.pone.0061217>.
- 503 38. Wickham H. 2016. *ggplot2: Elegant Graphics for Data Analysis*. Springer.
- 504 39. Bray JR, Roger Bray J, Curtis JT. 1957. An Ordination of the Upland Forest Communities of  
505 Southern Wisconsin. *Ecological Monographs* <https://doi.org/10.2307/1942268>.
- 506 40. Shannon CE, Weaver W. 1998. *The Mathematical Theory of Communication*. University of  
507 Illinois Press.

- 508 41. Love MI, Huber W, Anders S. 2014. Moderated estimation of fold change and dispersion  
509 for RNA-seq data with DESeq2. *Genome Biol* 15:550.
- 510 42. Douglas GM, Maffei VJ, Zaneveld JR, Yurgel SN, Brown JR, Taylor CM, Huttenhower C,  
511 Langille MGI. 2020. PICRUSt2 for prediction of metagenome functions. *Nature*  
512 *Biotechnology* <https://doi.org/10.1038/s41587-020-0548-6>.
- 513 43. Pang Z, Chong J, Zhou G, de Lima Morais DA, Chang L, Barrette M, Gauthier C, Jacques P-É,  
514 Li S, Xia J. 2021. MetaboAnalyst 5.0: narrowing the gap between raw spectra and  
515 functional insights. *Nucleic Acids Research* <https://doi.org/10.1093/nar/gkab382>.
- 516 44. Gilbert JA, Blaser MJ, Caporaso JG, Jansson JK, Lynch SV, Knight R. 2018. Current  
517 understanding of the human microbiome. *Nat Med* 24:392–400.
- 518 45. Rotaru DC, Mientjes EJ, Elgersma Y. 2020. Angelman Syndrome: From Mouse Models to  
519 Therapy. *Neuroscience* 445:172–189.
- 520 46. Bowerman KL, Knowles SCL, Bradley JE, Baltrūnaitė L, Lynch MDJ, Jones KM, Hugenholtz P.  
521 2021. Effects of laboratory domestication on the rodent gut microbiome. *ISME*  
522 *Communications* <https://doi.org/10.1038/s43705-021-00053-9>.
- 523 47. Nagpal R, Wang S, Solberg Woods LC, Seshie O, Chung ST, Shively CA, Register TC, Craft S,  
524 McClain DA, Yadav H. 2018. Comparative Microbiome Signatures and Short-Chain Fatty  
525 Acids in Mouse, Rat, Non-human Primate, and Human Feces. *Front Microbiol* 9:2897.
- 526 48. Heeney DD, Gareau MG, Marco ML. 2018. Intestinal *Lactobacillus* in health and disease, a



- 527 driver or just along for the ride? *Current Opinion in Biotechnology*
- 528 <https://doi.org/10.1016/j.copbio.2017.08.004>.
- 529 49. Le B, Yang SH. 2018. Efficacy of *Lactobacillus plantarum* in prevention of inflammatory
- 530 bowel disease. *Toxicology Reports* <https://doi.org/10.1016/j.toxrep.2018.02.007>.
- 531 50. Mu Q, Tavella VJ, Luo XM. 2018. Role of in Human Health and Diseases. *Front Microbiol*
- 532 9:757.
- 533 51. Walter J. 2008. Ecological Role of Lactobacilli in the Gastrointestinal Tract: Implications for
- 534 Fundamental and Biomedical Research. *Applied and Environmental Microbiology*
- 535 <https://doi.org/10.1128/aem.00753-08>.
- 536 52. Khalif I, Quigley E, Konovitch E, Maximova I. 2005. Alterations in the colonic flora and
- 537 intestinal permeability and evidence of immune activation in chronic constipation.
- 538 *Digestive and Liver Disease* <https://doi.org/10.1016/j.dld.2005.06.008>.
- 539 53. Ohkusa T, Koido S, Nishikawa Y, Sato N. 2019. Gut Microbiota and Chronic Constipation: A
- 540 Review and Update. *Front Med* 6:19.
- 541 54. Xu M, Xu X, Li J, Li F. 2019. Association Between Gut Microbiota and Autism Spectrum
- 542 Disorder: A Systematic Review and Meta-Analysis. *Front Psychiatry* 10:473.
- 543 55. Fattorusso A, Di Genova L, Dell'Isola GB, Mencaroni E, Esposito S. 2019. Autism Spectrum
- 544 Disorders and the Gut Microbiota. *Nutrients* 11.
- 545 56. Vacca M, Celano G, Calabrese FM, Portincasa P, Gobbetti M, De Angelis M. 2020. The

- 546 Controversial Role of Human Gut Lachnospiraceae. *Microorganisms* 8.
- 547 57. Murros KE, Huynh VA, Takala TM, Saris PEJ. 2021. Desulfovibrio Bacteria Are Associated  
548 With Parkinson's Disease. *Frontiers in Cellular and Infection Microbiology*  
549 <https://doi.org/10.3389/fcimb.2021.652617>.
- 550 58. Wan L, Ge W-R, Zhang S, Sun Y-L, Wang B, Yang G. 2020. Case-Control Study of the Effects  
551 of Gut Microbiota Composition on Neurotransmitter Metabolic Pathways in Children With  
552 Attention Deficit Hyperactivity Disorder. *Front Neurosci* 14:127.
- 553 59. Chernikova MA, Flores GD, Kilroy E, Labus JS, Mayer EA, Aziz-Zadeh L. 2021. The Brain-Gut-  
554 Microbiome System: Pathways and Implications for Autism Spectrum Disorder. *Nutrients*  
555 13.
- 556 60. Lurz E, Horne RG, Määttänen P, Wu RY, Botts SR, Li B, Rossi L, Johnson-Henry KC, Pierro A,  
557 Surette MG, Sherman PM. 2020. Vitamin B12 Deficiency Alters the Gut Microbiota in a  
558 Murine Model of Colitis. *Frontiers in Nutrition* <https://doi.org/10.3389/fnut.2020.00083>.
- 559 61. Benight NM, Stoll B, Chacko S, da Silva VR, Marini JC, Gregory JF 3rd, Stabler SP, Burrin DG.  
560 2011. B-vitamin deficiency is protective against DSS-induced colitis in mice. *Am J Physiol*  
561 *Gastrointest Liver Physiol* 301:G249–59.
- 562 62. Bressenot A, Pooya S, Bossenmeyer-Pourie C, Gauchotte G, Germain A, Chevaux J-B, Coste  
563 F, Vignaud J-M, Guéant J-L, Peyrin-Biroulet L. 2013. Methyl donor deficiency affects small-  
564 intestinal differentiation and barrier function in rats. *British Journal of Nutrition*  
565 <https://doi.org/10.1017/s0007114512001869>.

- 566 63. Erzin Y, Uzun H, Celik AF, Aydin S, Dirican A, Uzunismail H. 2008. Hyperhomocysteinemia in  
567 inflammatory bowel disease patients without past intestinal resections: correlations with  
568 cobalamin, pyridoxine, folate concentrations, acute phase reactants, disease activity, and  
569 prior thromboembolic complications. *J Clin Gastroenterol* 42:481–486.
- 570 64. Alharthi A, Alhazmi S, Alburae N, Bahieldin A. 2022. The Human Gut Microbiome as a  
571 Potential Factor in Autism Spectrum Disorder. *Int J Mol Sci* 23.

## 572 FIGURES AND FIGURE LEGENDS

573 **Figure 1. Microbial community structures differ between the animal models.** Alpha  
574 diversity analysis (**A**) presents both richness (Chao1) and diversity (Shannon) indexes, and  
575 Kruskal-Wallis pairwise comparison was performed to determine the difference between the  
576 overall animal models. Rats are significantly richer ( $p = 6.992939e-12$ ) and diverse ( $p =$   
577  $8.370003e-12$ ) than mice. Rats are also more diverse than pig ( $p = 2.417261e-05$ ), while pigs  
578 are richer than mouse ( $p = 9.155458e-06$ ). Beta diversity analysis using Bray-Curtis  
579 dissimilarities index shows significant dispersion of the samples by animal model (Adonis  $p =$   
580 0.001).

581 **Figure 2. Individual animal models' overall gut microbial composition structure is not**  
582 **altered by AS genotype.** Bray-Curtis dissimilarities index was used to analyze the dispersion of  
583 samples using an NMDS visualization. The mouse model presents no significant dispersion of  
584 the samples (**A**), but alpha diversity shows AS mice are richer ( $p = 0.015$ ) and more diverse ( $p =$   
585  $0.046$ ) than WT (**B**). Rat and Pig models show no significant dispersion (**C & E**), and no  
586 difference in alpha richness or diversity indexes (**D & F**).

587 **Figure 3. Phylum level differences between AS and WT by animal model.** All panels  
588 represent phyla composition present above 1% relative abundance. A comparison of overall  
589 phyla composition between the animal models (mouse [**A**], rat [**B**], pig [**C**]) and genotype (AS  
590 and WT) presents a similar decrease of Firmicutes and an increase of Bacteroides across all  
591 species.

592 **Figure 4. Genus level differences between AS and WT by animal model.** Relative  
593 abundance of genera above 1% shows different genus compositions across all animal models.  
594 Mice (**A**) show a decrease in *Dubosiella* and *Lactobacillus* and an increase in *Helicobacter* and  
595 *Bacteroides* in AS vs WT. In rats (**B**), we see an increase in the *Lachnospiraceae NK4A136*  
596 *group* and a decrease in *Akkermansias* in AS vs WT. Finally, in the pig model (**C**), we see an  
597 increase in *Tepidibacter* and *Blautia*, a decrease in *Clostridium sensu stricto 1*, and

598 *Lachnospiraceae* UCG-005 in AS vs WT.

599 **Figure 5. Fold change analysis shows significantly different bacterial groups associated**  
600 **with AS.** This analysis only considered bacteria that showed significant differences between the  
601 genotype ( $p < 0.05$ ). **(A)** Overall differences between genotypes across the microbiome of all  
602 animal models. Values above 0 are correlated with AS and values below are correlated with  
603 WT. **(B,C,D)** The bacterial groups associated with AS in individual animal models (mouse, rat,  
604 and pig).

605 **Figure 6. Metabolic pathway prediction analysis shows significant differences between**  
606 **genotype and animal model.** Prediction of metabolic pathways based on the microbial  
607 ecosystem was analyzed and pathways significantly different in overall (A) and individual animal  
608 models (mouse [A], rat [B], pig [C]) showed no overlap but similar functional correlations related  
609 to vitamin synthesis and utilization.

610

611

612

613

614

615

616

617

618

619

620

621

622

623

624 **Table #1. Sample and Feature Sequence Frequency**

| <b>Total Samples</b>       |         |
|----------------------------|---------|
| N Samples                  | 75      |
| N Features                 | 7746    |
| Mean Frequency per sample  | 34,391  |
| Mean Frequency per feature | 238,270 |

625

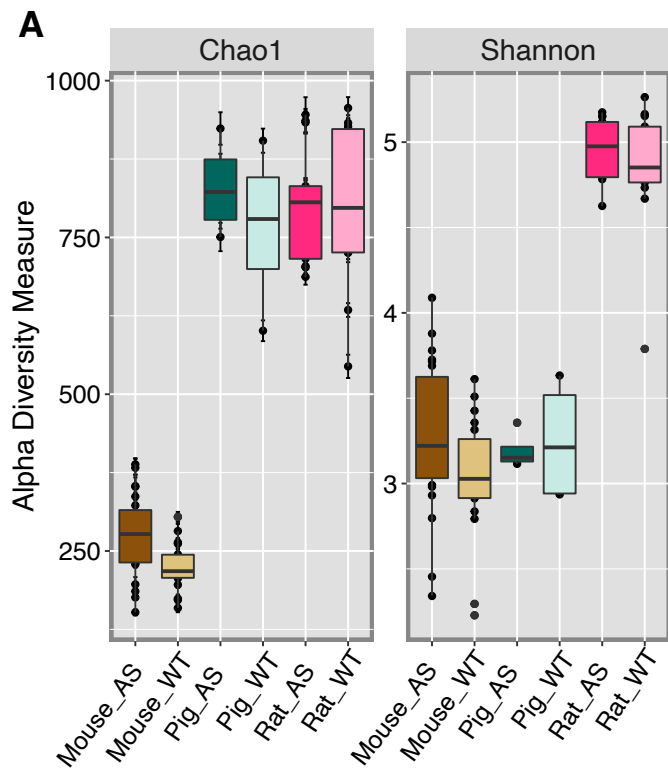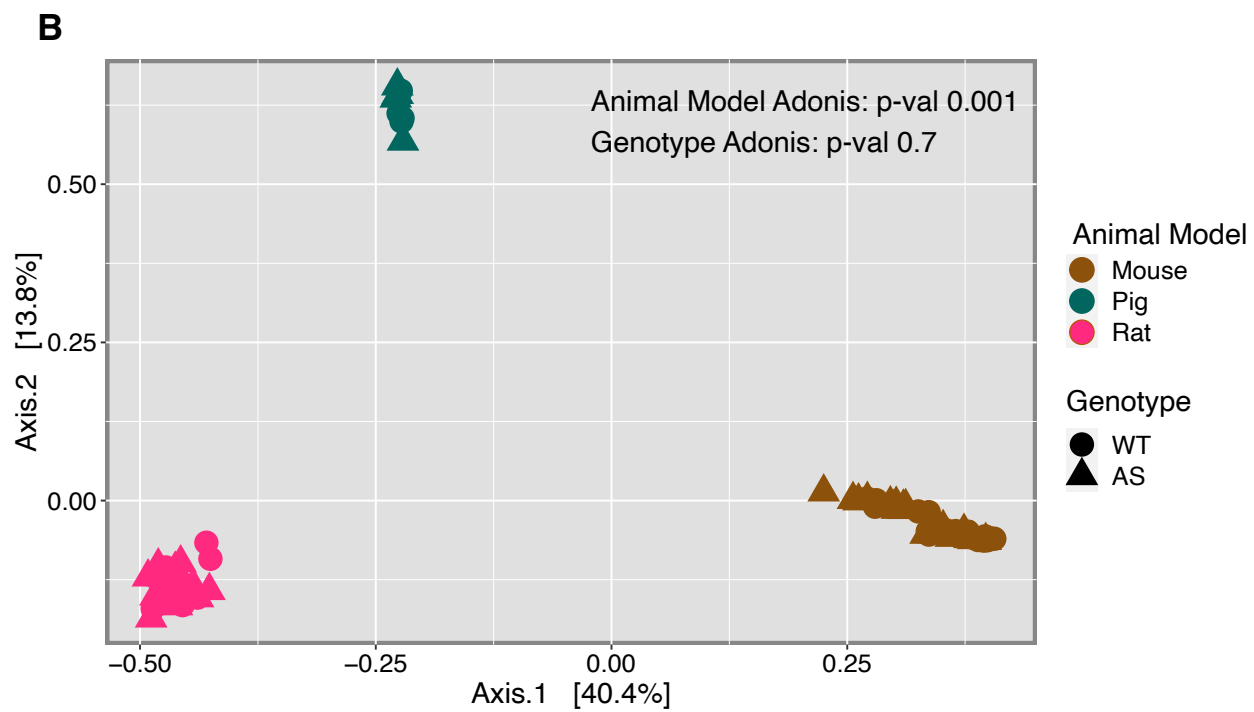

## MOUSE

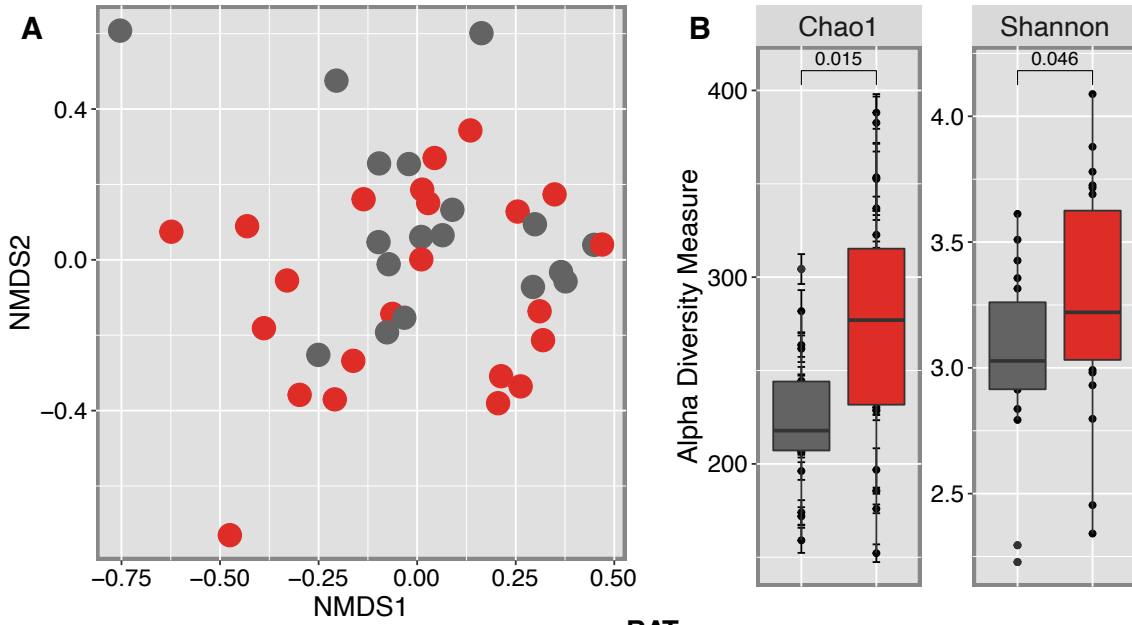

## RAT

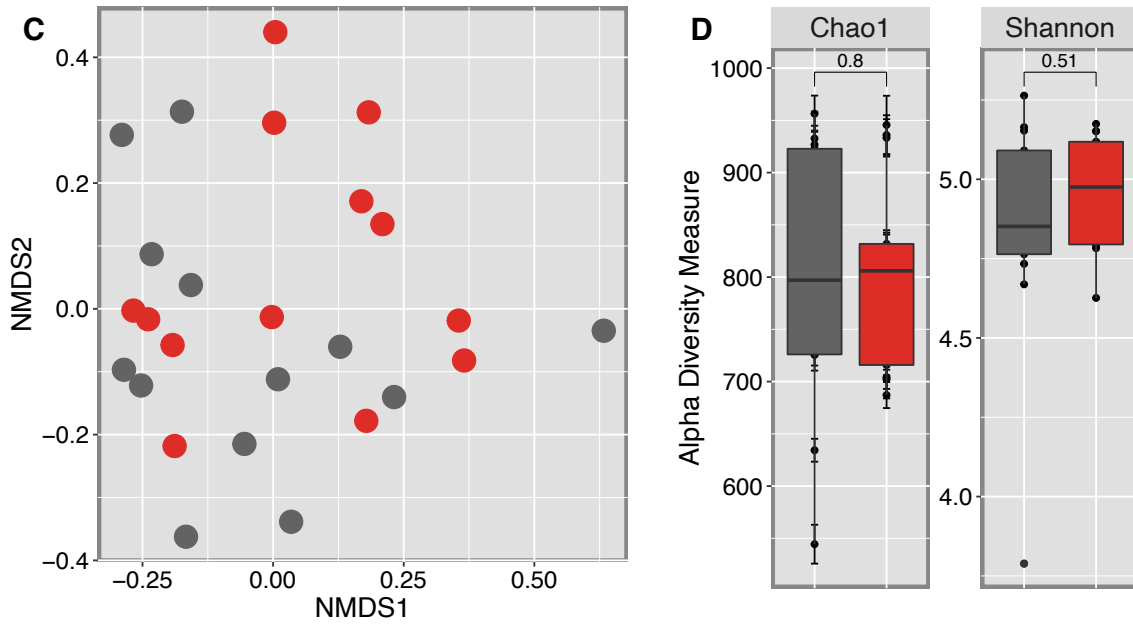

## PIG

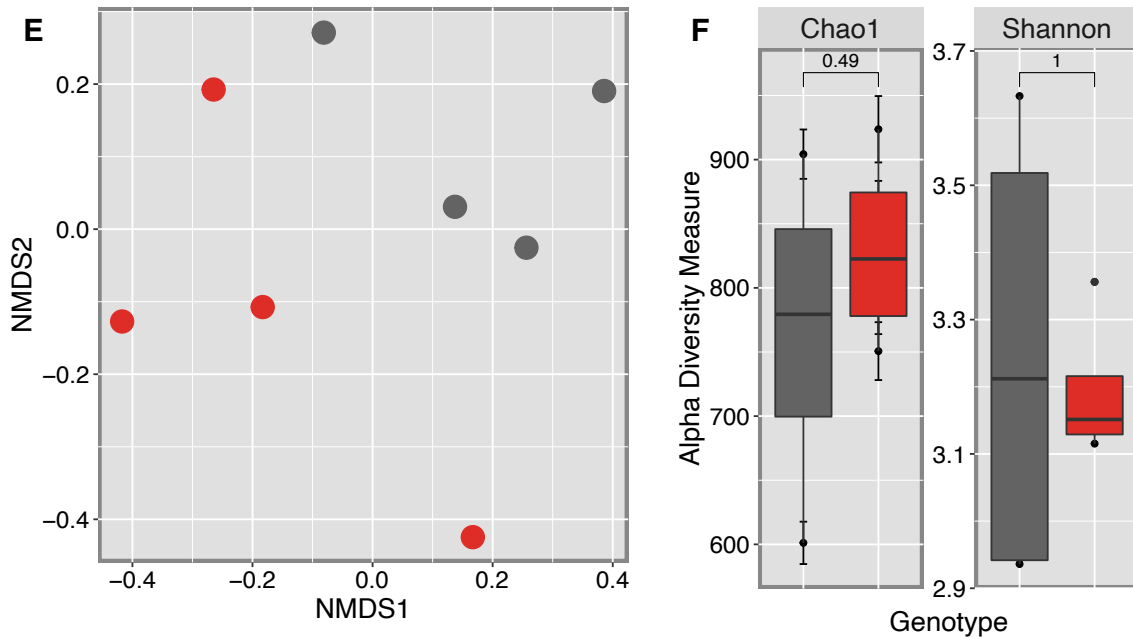

Genotype WT AS



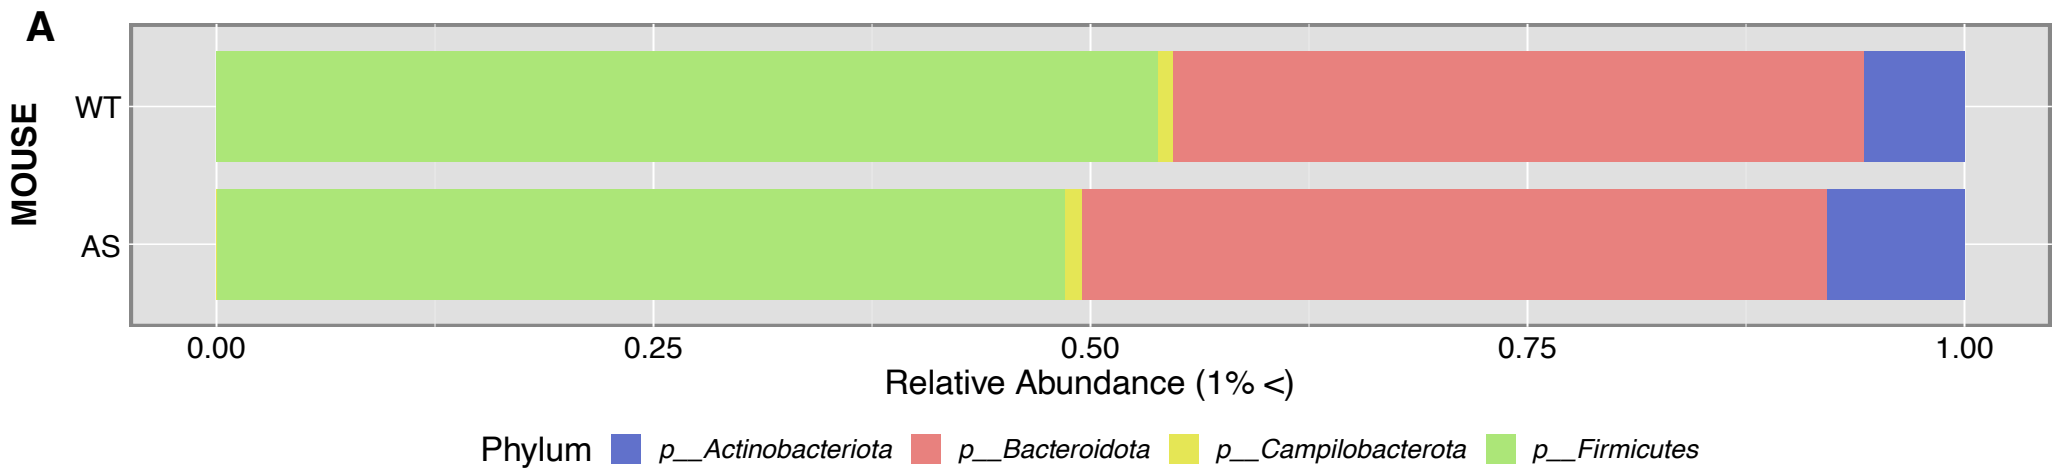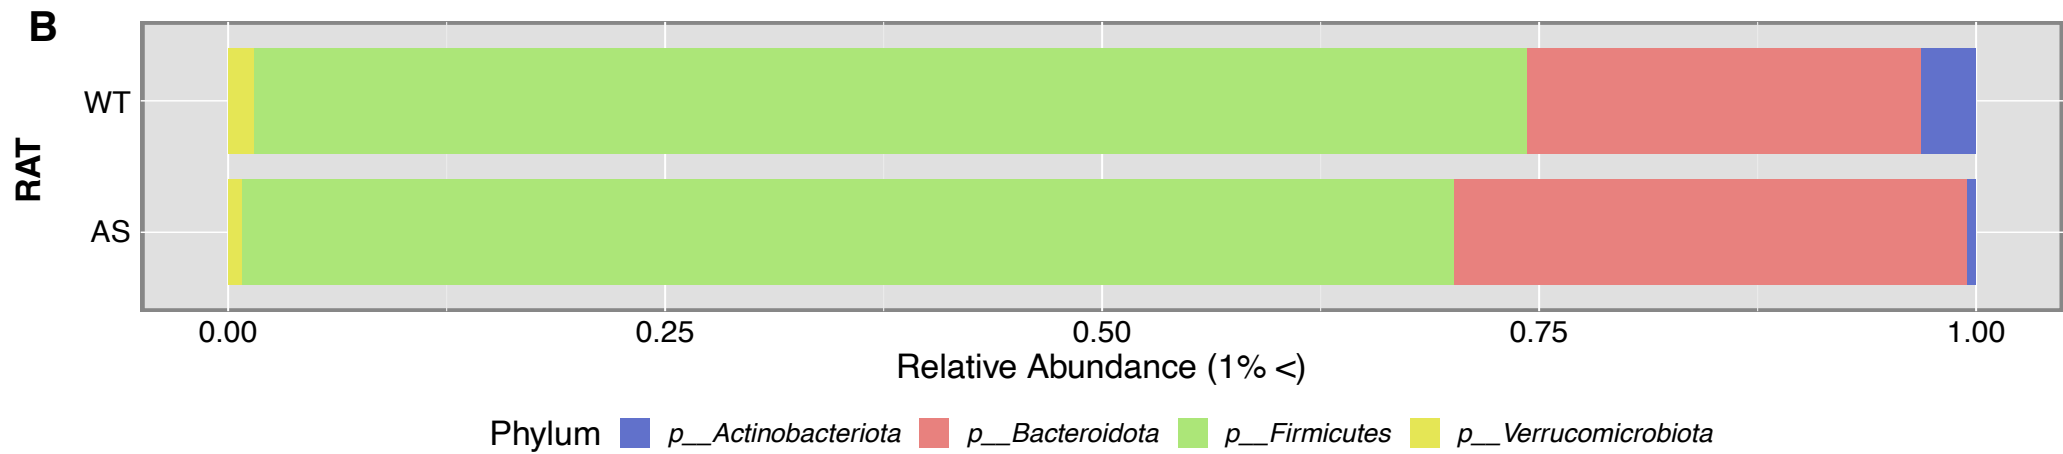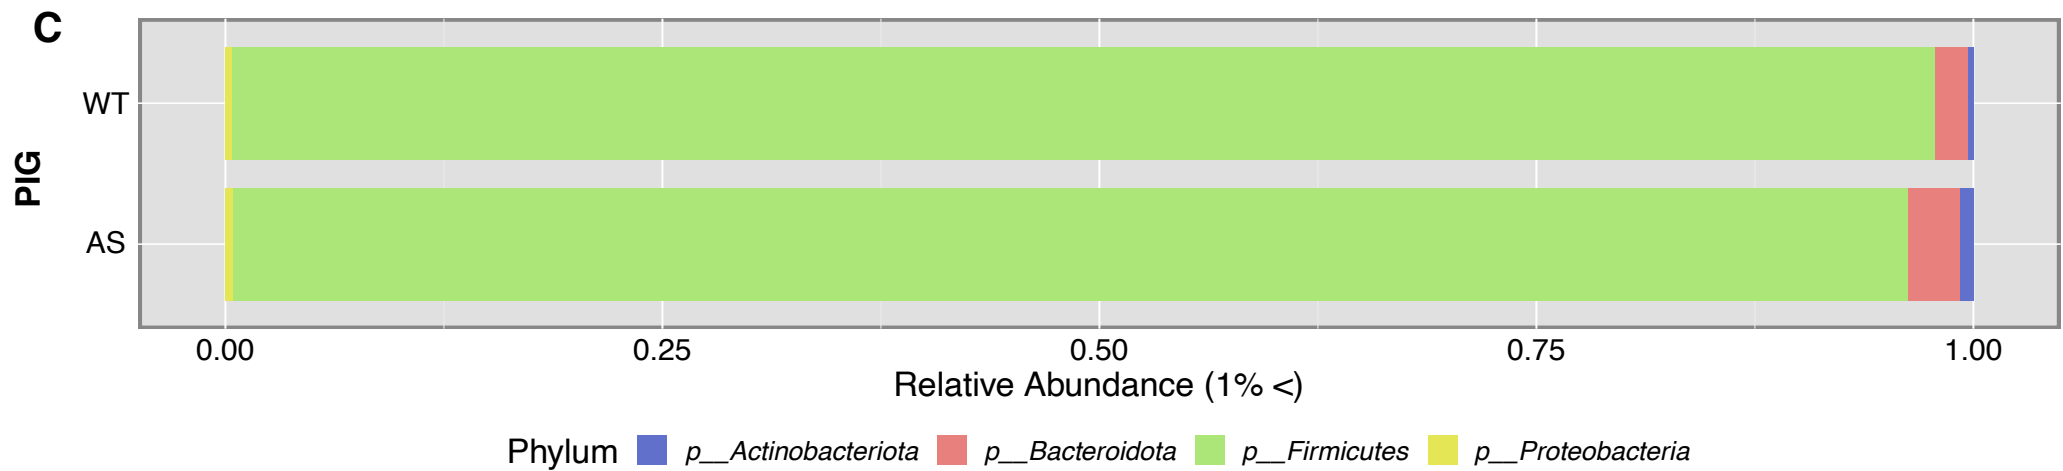

**A**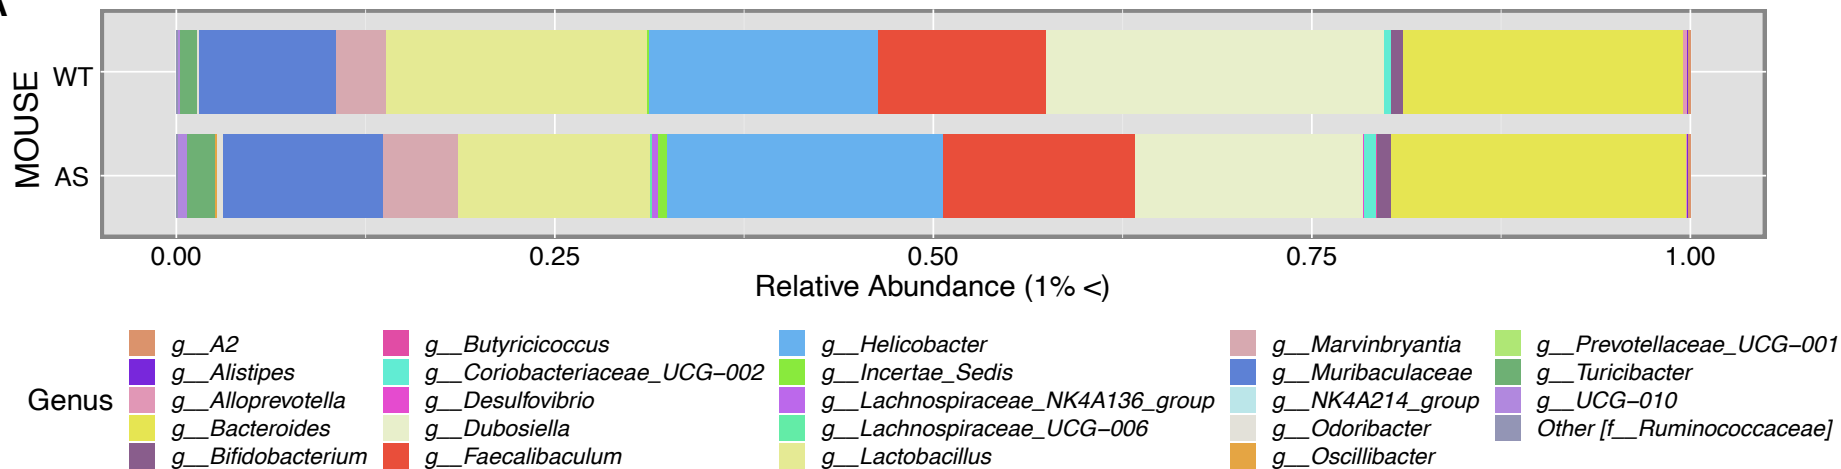**B**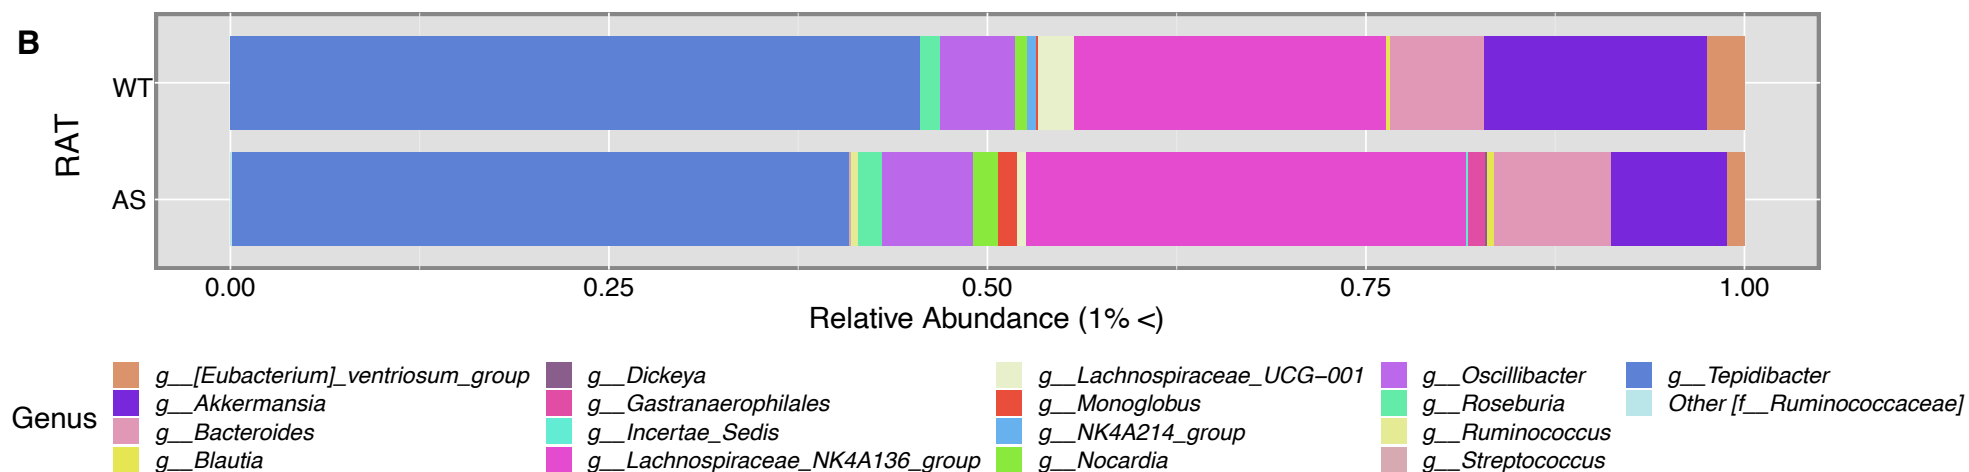**C**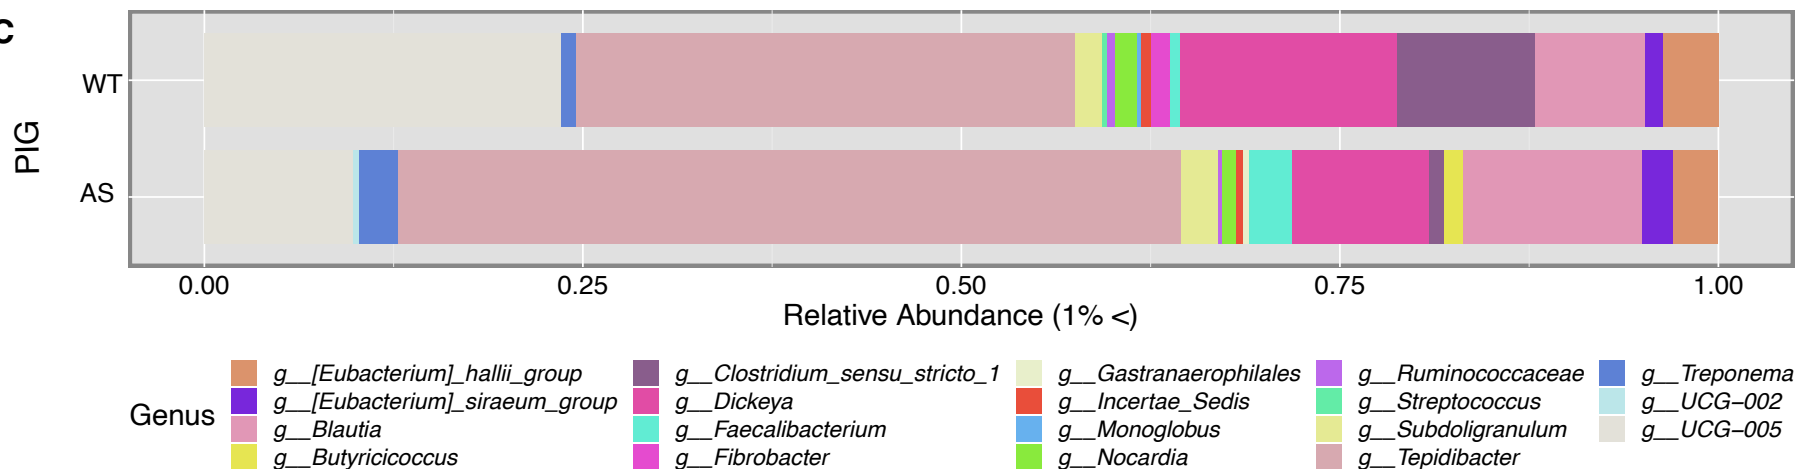

**A**

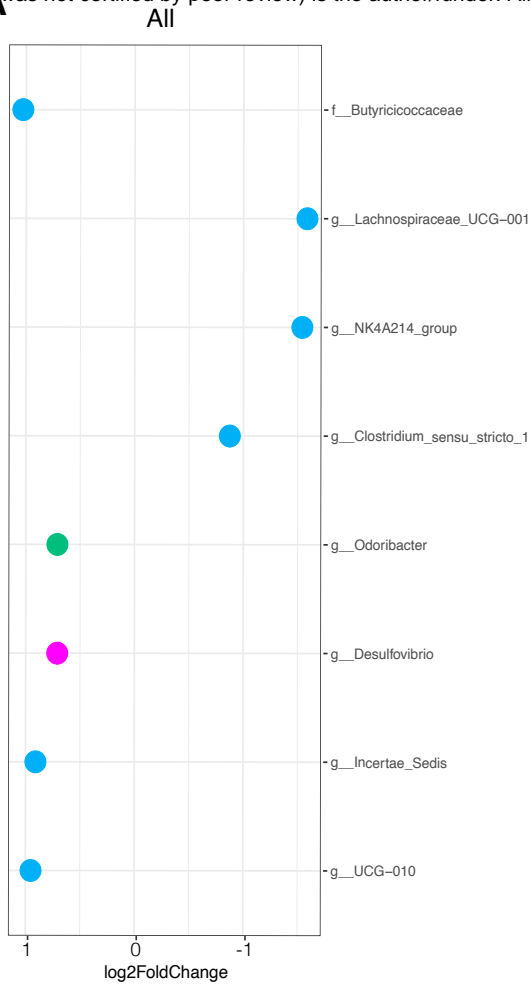

**B**

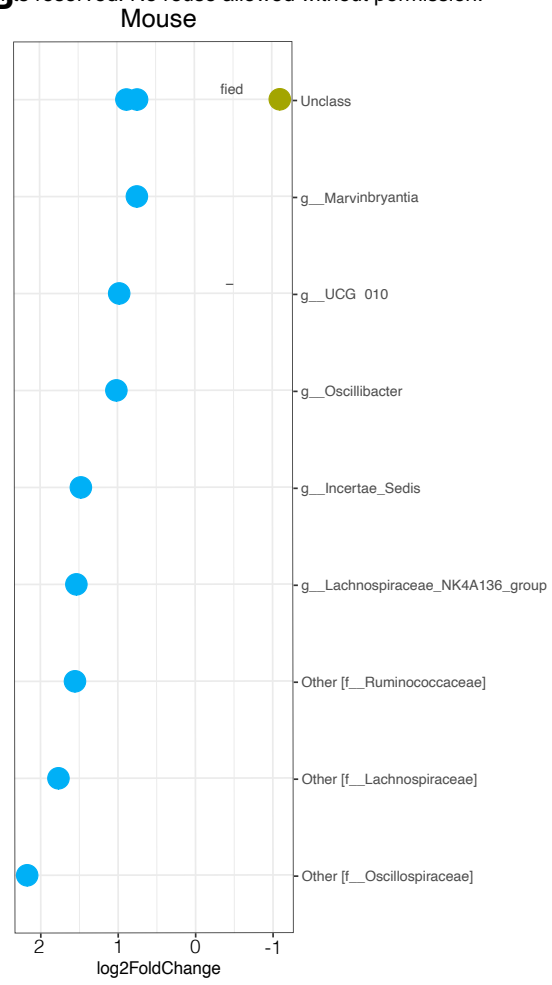

**C**

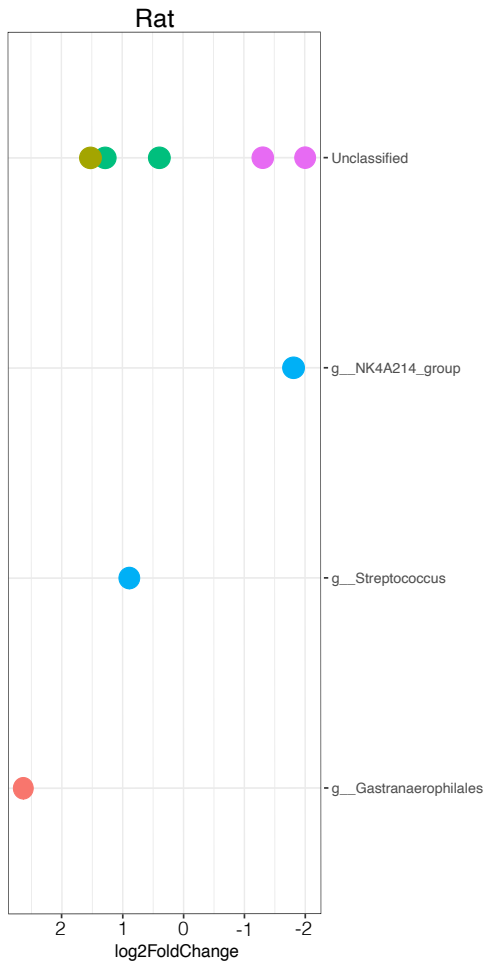

**D**

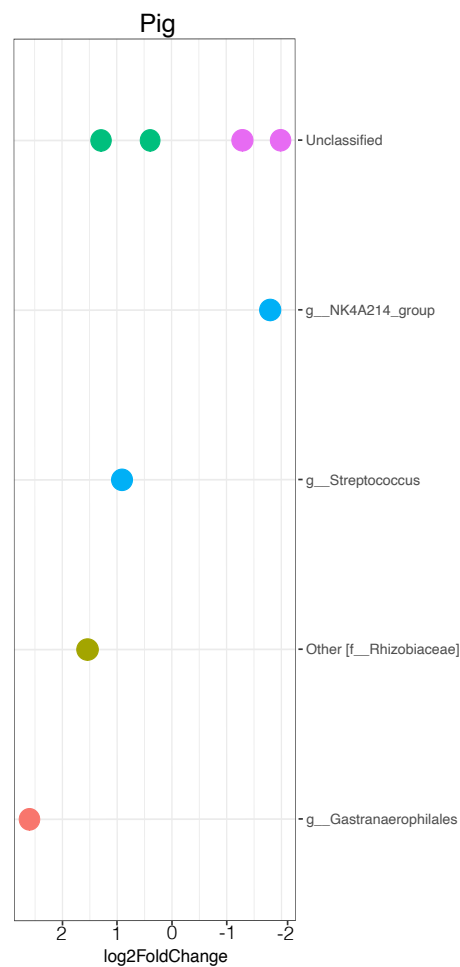

Phylum ● p\_\_Cyanobacteria ● p\_\_Firmicutes ● p\_\_Bacteroidota ● p\_\_Proteobacteria ● p\_\_Actinobacteriota ● p\_\_Desulfobacterota

**A**

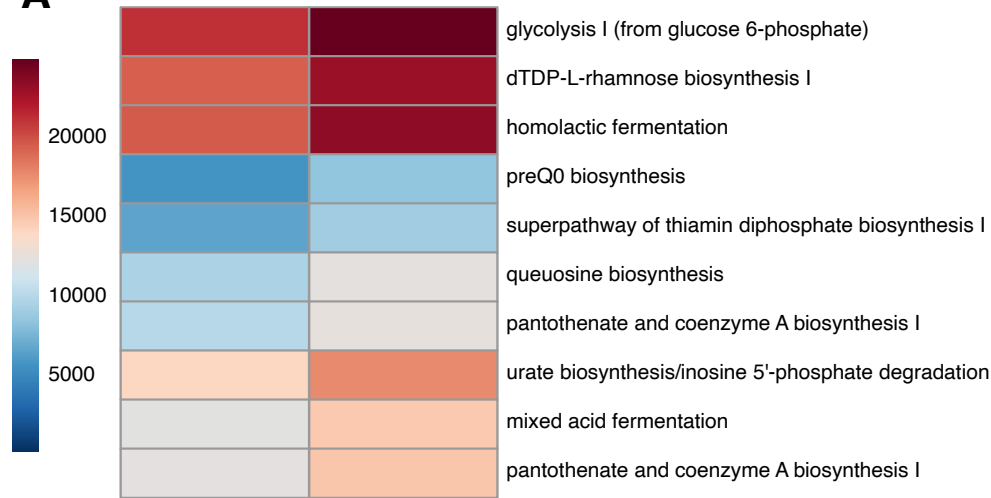

**B**

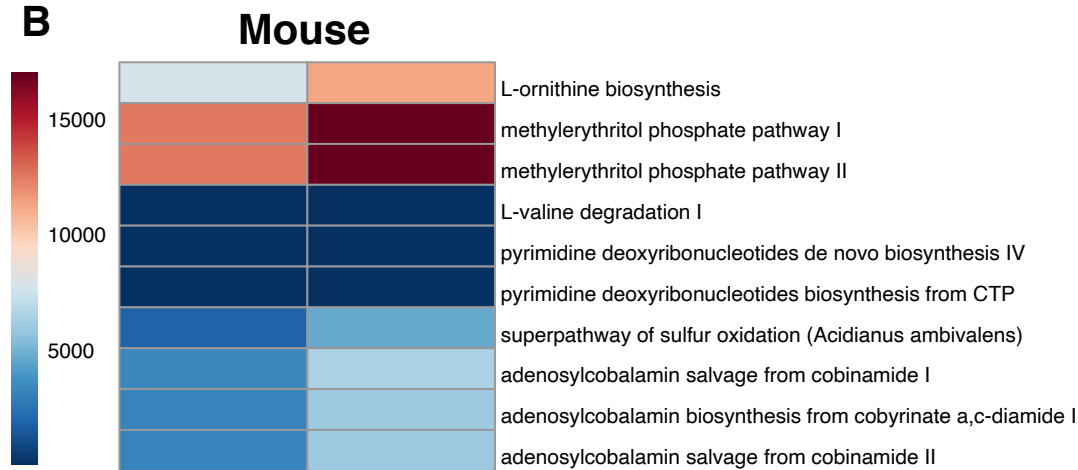

**C**

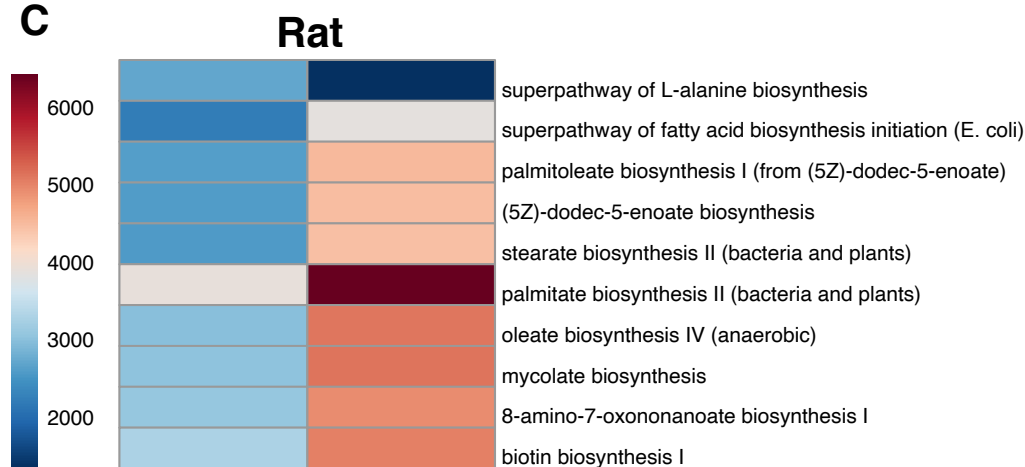

**D**

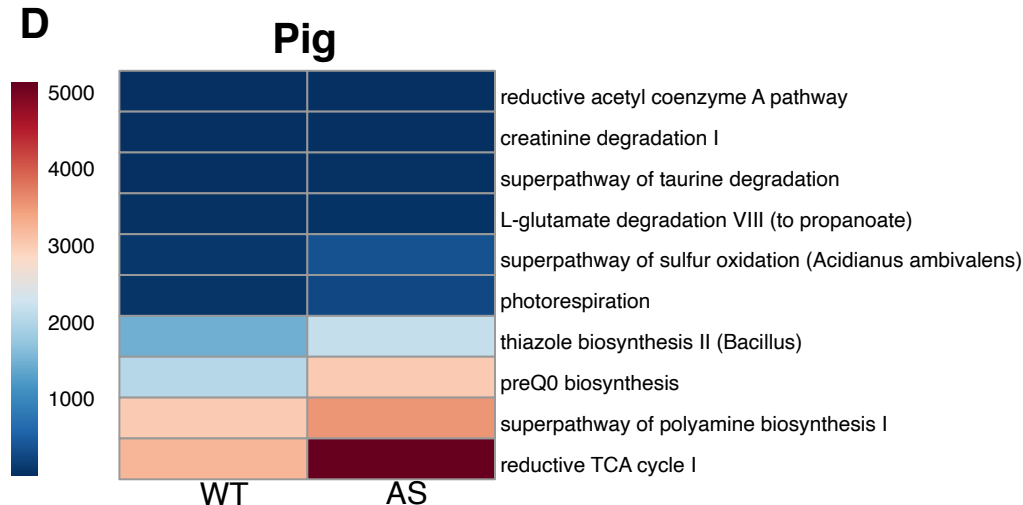

Source: http://biorxiv.org/content/10.1101/2022.07.05.498914v1.full.pdf
